# Supplementary material for: Characterization of Soaking Process’ Impact in Common Beans Phenolic Composition: Contribute from the Unexplored Portuguese Germplasm
Source: PubMed Central journal article supplement (PMC6723714; doi:10.3390/foods8080296), 2019-07-28
Supplement: foods-08-00296-s001.pdf [file foods-08-00296-s001.pdf]

## Supplementary materials

**Table S1.** Average values  $\pm$  Standard Deviation of Total Phenolic Content (TPC), mg GAE/g DW, Total Flavonoid Content (TFC), mg CE/g DW, and Total Proanthocyanidin Content (TPAC), mg CE/g DW, determined in common bean whole flour (WF) and soaking water (SW). ORAC,  $\mu$ mol TEAC/g DW, was determined in whole flour (WF). TPC(SW)/ TPC(WF), TFC(SW)/ TFC(WF), TPAC(SW)/ TPAC(WF) are, respectively, the percentage of TPC, TFC and TPAC released into the soaking water

| Sample                                                                         | PRT 005<br>accession n° | Moisture<br>Content (%) | Whole Flour     |                 |                 |                   | Soaking Water   |                             |                 |                            |                 |                              |
|--------------------------------------------------------------------------------|-------------------------|-------------------------|-----------------|-----------------|-----------------|-------------------|-----------------|-----------------------------|-----------------|----------------------------|-----------------|------------------------------|
|                                                                                |                         |                         | TPC_WF          | TFC_WF          | TPAC_WF         | ORAC_WF           | TPC_SW          | TPC(SW)/<br>TPC(WF)<br>(%)* | TFC_SW          | TFC(SW)/<br>TFC(WF)<br>(%) | TPAC_SW         | TPAC(SW)/<br>TPAC(WF)<br>(%) |
| <b>White varieties</b>                                                         |                         |                         |                 |                 |                 |                   |                 |                             |                 |                            |                 |                              |
| 1                                                                              | 4144                    | 12.98                   | 1.68 $\pm$ 0.04 | 0.10 $\pm$ 0.00 | 0.02 $\pm$ 0.00 | 33.31 $\pm$ 2.41  | 0.09 $\pm$ 0.00 | 5                           | 0.01 $\pm$ 0.00 | 10                         | 0.04 $\pm$ 0.01 | >100                         |
| 2                                                                              | 5383                    | 10.25                   | 1.12 $\pm$ 0.03 | 0.14 $\pm$ 0.01 | 0.01 $\pm$ 0.00 | 36.79 $\pm$ 2.96  | 0.13 $\pm$ 0.00 | 12                          | 0.01 $\pm$ 0.00 | 7                          | 0.04 $\pm$ 0.01 | >100                         |
| 3                                                                              | 4088                    | 12.98                   | 1.47 $\pm$ 0.01 | 0.18 $\pm$ 0.01 | 0.01 $\pm$ 0.00 | 44.63 $\pm$ 0.26  | 0.21 $\pm$ 0.01 | 14                          | 0.01 $\pm$ 0.00 | 6                          | 0.04 $\pm$ 0.01 | >100                         |
| 4                                                                              | 1979                    | 10.17                   | 1.41 $\pm$ 0.06 | 0.10 $\pm$ 0.01 | 0.02 $\pm$ 0.00 | 33.04 $\pm$ 1.59  | 0.09 $\pm$ 0.00 | 6                           | 0.01 $\pm$ 0.00 | 10                         | 0.04 $\pm$ 0.00 | >100                         |
| 5                                                                              | 5249                    | 12.98                   | 1.23 $\pm$ 0.04 | 0.20 $\pm$ 0.01 | 0.01 $\pm$ 0.00 | 39.00 $\pm$ 1.90  | 0.09 $\pm$ 0.00 | 7                           | 0.01 $\pm$ 0.00 | 5                          | 0.02 $\pm$ 0.00 | >100                         |
| <b>Yellow variety</b>                                                          |                         |                         |                 |                 |                 |                   |                 |                             |                 |                            |                 |                              |
| 6                                                                              | 5388                    | 12.98                   | 3.12 $\pm$ 0.12 | 0.97 $\pm$ 0.04 | 0.15 $\pm$ 0.01 | 93.54 $\pm$ 1.24  | 0.83 $\pm$ 0.10 | 27                          | 0.66 $\pm$ 0.07 | 68                         | 0.11 $\pm$ 0.01 | 73                           |
| <b>White background variety with brown speckles and brown marginal pattern</b> |                         |                         |                 |                 |                 |                   |                 |                             |                 |                            |                 |                              |
| 7                                                                              | 4185                    | 9.37                    | 2.89 $\pm$ 0.03 | 0.78 $\pm$ 0.01 | 0.47 $\pm$ 0.14 | 74.17 $\pm$ 3.57  | 1.29 $\pm$ 0.07 | 45                          | 0.83 $\pm$ 0.03 | >100                       | 0.09 $\pm$ 0.02 | 19                           |
| <b>White and brown background variety</b>                                      |                         |                         |                 |                 |                 |                   |                 |                             |                 |                            |                 |                              |
| 8                                                                              | 4189                    | 10.89                   | 2.57 $\pm$ 0.17 | 0.77 $\pm$ 0.01 | 0.12 $\pm$ 0.02 | 77.84 $\pm$ 1.82  | 1.10 $\pm$ 0.05 | 43                          | 0.34 $\pm$ 0.02 | 44                         | 0.04 $\pm$ 0.00 | 33                           |
| <b>Pink varieties</b>                                                          |                         |                         |                 |                 |                 |                   |                 |                             |                 |                            |                 |                              |
| 9                                                                              | 4110                    | 12.98                   | 5.65 $\pm$ 0.14 | 2.88 $\pm$ 0.03 | 0.75 $\pm$ 0.05 | 187.72 $\pm$ 2.75 | 1.74 $\pm$ 0.03 | 31                          | 1.03 $\pm$ 0.07 | 36                         | 0.52 $\pm$ 0.13 | 69                           |
| 10                                                                             | 4179                    | 10.59                   | 4.35 $\pm$ 0.00 | 1.08 $\pm$ 0.03 | 0.08 $\pm$ 0.00 | 137.46 $\pm$ 6.81 | 0.57 $\pm$ 0.03 | 13                          | 0.35 $\pm$ 0.01 | 32                         | 0.06 $\pm$ 0.01 | 75                           |
| <b>Pink background variety with brown stripes</b>                              |                         |                         |                 |                 |                 |                   |                 |                             |                 |                            |                 |                              |
| 11                                                                             | 4182-P                  | 12.98                   | 3.52 $\pm$ 0.09 | 1.38 $\pm$ 0.07 | 0.06 $\pm$ 0.00 | 93.92 $\pm$ 1.86  | 1.56 $\pm$ 0.05 | 44                          | 0.90 $\pm$ 0.02 | 65                         | 0.31 $\pm$ 0.06 | >100                         |
| <b>Pink background varieties with purple stripes</b>                           |                         |                         |                 |                 |                 |                   |                 |                             |                 |                            |                 |                              |
| 12                                                                             | 4119                    | 12.98                   | 5.06 $\pm$ 0.10 | 2.78 $\pm$ 0.08 | 1.52 $\pm$ 0.04 | 182.97 $\pm$ 5.42 | 2.95 $\pm$ 0.03 | 58                          | 2.05 $\pm$ 0.09 | 74                         | 0.98 $\pm$ 0.13 | 64                           |
| 13                                                                             | 4097                    | 10.18                   | 4.91 $\pm$ 0.08 | 1.80 $\pm$ 0.03 | 0.62 $\pm$ 0.08 | 121.30 $\pm$ 5.04 | 2.29 $\pm$ 0.04 | 47                          | 1.57 $\pm$ 0.05 | 87                         | 0.52 $\pm$ 0.18 | 84                           |
| 14                                                                             | 4038                    | 9.46                    | 4.49 $\pm$ 0.11 | 2.34 $\pm$ 0.03 | 1.13 $\pm$ 0.08 | 140.31 $\pm$ 0.24 | 2.57 $\pm$ 0.08 | 57                          | 1.79 $\pm$ 0.01 | 76                         | 1.00 $\pm$ 0.15 | 88                           |
| 15                                                                             | 4051                    | 12.98                   | 4.79 $\pm$ 0.06 | 2.51 $\pm$ 0.14 | 0.85 $\pm$ 0.05 | 174.53 $\pm$ 7.21 | 2.57 $\pm$ 0.01 | 54                          | 1.59 $\pm$ 0.05 | 63                         | 0.60 $\pm$ 0.01 | 71                           |
| 16                                                                             | 5389                    | 10.40                   | 3.91 $\pm$ 0.11 | 1.35 $\pm$ 0.08 | 0.64 $\pm$ 0.05 | 107.54 $\pm$ 0.91 | 1.56 $\pm$ 0.05 | 40                          | 1.35 $\pm$ 0.08 | >100                       | 1.00 $\pm$ 0.06 | >100                         |

Table S1. Cont.

| Sample                                                   | PRT 005<br>accession n <sup>o</sup> | Moisture<br>content (%) | Whole Flour |             |             |                | Soaking Water |                            |             |                            |             |                           |
|----------------------------------------------------------|-------------------------------------|-------------------------|-------------|-------------|-------------|----------------|---------------|----------------------------|-------------|----------------------------|-------------|---------------------------|
|                                                          |                                     |                         | TPC_WF      | TFC_WF      | TPAC_WF     | ORAC_WF        | TPC_SW        | TPC(SW)/<br>TPC(WF)<br>(%) | TFC_SW      | TFC(SW)/<br>TFC(WF)<br>(%) | TPAC_SW     | TPAC(SW)/T<br>PAC(WF) (%) |
| <b>Red varieties</b>                                     |                                     |                         |             |             |             |                |               |                            |             |                            |             |                           |
| 17                                                       | 4120                                | 11.08                   | 3.80 ± 0.05 | 1.24 ± 0.01 | 0.51 ± 0.11 | 97.72 ± 2.89   | 1.29 ± 0.06   | 34                         | 0.90 ± 0.01 | 73                         | 0.18 ± 0.03 | 35                        |
| 18                                                       | 5387                                | 10.39                   | 5.39 ± 0.16 | 1.52 ± 0.06 | 0.99 ± 0.09 | 151.03 ± 6.53  | 3.04 ± 0.07   | 56                         | 1.48 ± 0.01 | 97                         | 1.05 ± 0.09 | >100                      |
| 19                                                       | 4070                                | 10.13                   | 4.44 ± 0.11 | 1.21 ± 0.04 | 0.07 ± 0.01 | 125.62 ± 3.28  | 1.78 ± 0.06   | 40                         | 1.09 ± 0.03 | 90                         | 0.49 ± 0.05 | >100                      |
| 20                                                       | 5382                                | 11.14                   | 4.17 ± 0.10 | 1.49 ± 0.04 | 0.90 ± 0.13 | 90.82 ± 2.36   | 1.84 ± 0.04   | 44                         | 1.19 ± 0.01 | 80                         | 0.39 ± 0.04 | 43                        |
| 21                                                       | 4149-R                              | 12.98                   | 5.31 ± 0.12 | 1.79 ± 0.08 | 0.79 ± 0.05 | 162.13 ± 7.8   | 1.67 ± 0.06   | 31                         | 1.02 ± 0.05 | 57                         | 0.18 ± 0.01 | 23                        |
| <b>Ligth brown variety</b>                               |                                     |                         |             |             |             |                |               |                            |             |                            |             |                           |
| 22                                                       | 4081                                | 12.98                   | 4.99 ± 0.07 | 1.49 ± 0.01 | 0.48 ± 0.02 | 143.74 ± 6.8   | 3.31 ± 0.10   | 66                         | 1.86 ± 0.05 | >100                       | 0.43 ± 0.02 | 90                        |
| <b>Brown varieties</b>                                   |                                     |                         |             |             |             |                |               |                            |             |                            |             |                           |
| 23                                                       | 4182-B                              | 10.30                   | 3.34 ± 0.09 | 0.89 ± 0.03 | 0.19 ± 0.03 | 80.80 ± 1.38   | 1.06 ± 0.02   | 32                         | 0.56 ± 0.02 | 63                         | 0.10 ± 0.02 | 53                        |
| 24                                                       | GC-34                               | 12.98                   | 4.82 ± 0.02 | 1.55 ± 0.04 | 0.10 ± 0.01 | 171.13 ± 5.65  | 1.33 ± 0.01   | 28                         | 1.11 ± 0.03 | 72                         | 0.32 ± 0.02 | >100                      |
| 25                                                       | GC-35                               | 12.98                   | 4.05 ± 0.01 | 1.77 ± 0.05 | 0.56 ± 0.01 | 182.71 ± 5.37  | 2.22 ± 0.09   | 55                         | 1.40 ± 0.05 | 79                         | 0.19 ± 0.01 | 34                        |
| 26                                                       | GC-17                               | 12.98                   | 4.72 ± 0.09 | 2.04 ± 0.01 | 0.52 ± 0.08 | 178.47 ± 5.24  | 1.74 ± 0.03   | 37                         | 1.08 ± 0.01 | 53                         | 0.28 ± 0.03 | 54                        |
| <b>Brown background varieties with dark brown strips</b> |                                     |                         |             |             |             |                |               |                            |             |                            |             |                           |
| 27                                                       | 4194                                | 12.98                   | 5.90 ± 0.08 | 2.88 ± 0.02 | 0.76 ± 0.04 | 188.73 ± 5.06  | 2.64 ± 0.07   | 45                         | 1.84 ± 0.03 | 64                         | 0.59 ± 0.07 | 78                        |
| 28                                                       | GC-40                               | 9.79                    | 5.26 ± 0.30 | 1.51 ± 0.02 | 0.85 ± 0.02 | 138.89 ± 4.25  | 2.01 ± 0.03   | 38                         | 1.14 ± 0.02 | 75                         | 0.17 ± 0.04 | 20                        |
| 29                                                       | 5384                                | 10.99                   | 4.34 ± 0.07 | 1.33 ± 0.02 | 0.53 ± 0.04 | 103.91 ± 1.72  | 1.50 ± 0.05   | 35                         | 0.85 ± 0.05 | 64                         | 0.12 ± 0.03 | 23                        |
| 30                                                       | 4085                                | 9.79                    | 6.05 ± 0.17 | 2.23 ± 0.02 | 1.33 ± 0.13 | 146.58 ± 4.06  | 2.86 ± 0.10   | 47                         | 1.61 ± 0.03 | 72                         | 0.78 ± 0.09 | 59                        |
| 31                                                       | 4071                                | 11.36                   | 7.71 ± 0.35 | 2.78 ± 0.17 | 1.16 ± 0.23 | 213.36 ± 11.51 | 3.15 ± 0.08   | 41                         | 2.10 ± 0.10 | 76                         | 0.81 ± 0.05 | 70                        |
| <b>Average ± SD (n=31)</b>                               |                                     |                         | 4.08 ± 1.56 | 1.45 ± 0.83 | 0.52 ± 0.44 | 121.09 ± 52.10 | 1.65 ± 0.96   |                            | 1.02 ± 0.63 |                            | 0.37 ± 0.34 |                           |

**Table S2.** Average values  $\pm$  Standard Deviation of Total Phenolic Content (TPC), mg GAE/g DW, Total Flavonoid Content (TFC), mg CE/g DW, and Total Proanthocyanidin Content (TPAC), mg CE/g DW, determined in soaked cotyledons (Cot) and coats (C)

| Sample                                                                         | PRT 005<br>accession n <sup>o</sup> | Cotyledons      |                 |                 | Coats           |                 |                 |
|--------------------------------------------------------------------------------|-------------------------------------|-----------------|-----------------|-----------------|-----------------|-----------------|-----------------|
|                                                                                |                                     | TPC_Cot         | TFC_Cot         | TPAC_Cot        | TPC_C           | TFC_C           | TPAC_C          |
| <b>White varieties</b>                                                         |                                     |                 |                 |                 |                 |                 |                 |
| 1                                                                              | 4144                                | 0.93 $\pm$ 0.00 | 0.15 $\pm$ 0.00 | 0.01 $\pm$ 0.00 | 0.04 $\pm$ 0.00 | 0.01 $\pm$ 0.00 | 0.01 $\pm$ 0.00 |
| 2                                                                              | 5383                                | 0.82 $\pm$ 0.02 | 0.15 $\pm$ 0.01 | 0.01 $\pm$ 0.00 | 0.04 $\pm$ 0.00 | 0.01 $\pm$ 0.00 | 0.01 $\pm$ 0.00 |
| 3                                                                              | 4088                                | 0.88 $\pm$ 0.03 | 0.13 $\pm$ 0.00 | 0.01 $\pm$ 0.00 | 0.04 $\pm$ 0.00 | 0.01 $\pm$ 0.00 | 0.01 $\pm$ 0.00 |
| 4                                                                              | 1979                                | 0.80 $\pm$ 0.04 | 0.14 $\pm$ 0.00 | 0.01 $\pm$ 0.00 | 0.03 $\pm$ 0.00 | 0.01 $\pm$ 0.00 | 0.01 $\pm$ 0.00 |
| 5                                                                              | 5249                                | 0.92 $\pm$ 0.02 | 0.16 $\pm$ 0.00 | 0.01 $\pm$ 0.00 | 0.03 $\pm$ 0.00 | 0.01 $\pm$ 0.00 | 0.01 $\pm$ 0.00 |
| <b>Yellow variety</b>                                                          |                                     |                 |                 |                 |                 |                 |                 |
| 6                                                                              | 5388                                | 0.85 $\pm$ 0.02 | 0.22 $\pm$ 0.00 | 0.01 $\pm$ 0.00 | 1.06 $\pm$ 0.06 | 0.49 $\pm$ 0.04 | 0.32 $\pm$ 0.01 |
| <b>White background variety with brown speckles and brown marginal pattern</b> |                                     |                 |                 |                 |                 |                 |                 |
| 7                                                                              | 4185                                | 0.90 $\pm$ 0.05 | 0.17 $\pm$ 0.00 | 0.01 $\pm$ 0.00 | 1.80 $\pm$ 0.07 | 1.24 $\pm$ 0.04 | 1.10 $\pm$ 0.10 |
| <b>White and Brown background variety</b>                                      |                                     |                 |                 |                 |                 |                 |                 |
| 8                                                                              | 4189                                | 1.11 $\pm$ 0.04 | 0.18 $\pm$ 0.00 | 0.01 $\pm$ 0.00 | 2.96 $\pm$ 0.09 | 2.1 $\pm$ 0.09  | 1.39 $\pm$ 0.11 |
| <b>Pink varieties</b>                                                          |                                     |                 |                 |                 |                 |                 |                 |
| 9                                                                              | 4110                                | 0.85 $\pm$ 0.03 | 0.18 $\pm$ 0.01 | 0.01 $\pm$ 0.00 | 3.92 $\pm$ 0.20 | 2.38 $\pm$ 0.28 | 3.47 $\pm$ 0.10 |
| 10                                                                             | 4179                                | 1.03 $\pm$ 0.04 | 0.22 $\pm$ 0.00 | 0.01 $\pm$ 0.00 | 1.21 $\pm$ 0.04 | 0.77 $\pm$ 0.03 | 0.66 $\pm$ 0.14 |
| <b>Pink background variety with brown stripes</b>                              |                                     |                 |                 |                 |                 |                 |                 |
| 11                                                                             | 4182-P                              | 1.02 $\pm$ 0.03 | 0.20 $\pm$ 0.00 | 0.01 $\pm$ 0.00 | 3.60 $\pm$ 0.03 | 2.29 $\pm$ 0.24 | 2.38 $\pm$ 0.45 |
| <b>Pink background varieties with purple stripes</b>                           |                                     |                 |                 |                 |                 |                 |                 |
| 12                                                                             | 4119                                | 1.10 $\pm$ 0.03 | 0.24 $\pm$ 0.01 | 0.01 $\pm$ 0.00 | 3.86 $\pm$ 0.08 | 2.40 $\pm$ 0.16 | 2.28 $\pm$ 0.10 |
| 13                                                                             | 4097                                | 1.01 $\pm$ 0.03 | 0.17 $\pm$ 0.00 | 0.01 $\pm$ 0.00 | 3.48 $\pm$ 0.06 | 2.21 $\pm$ 0.12 | 2.90 $\pm$ 0.74 |
| 14                                                                             | 4038                                | 1.04 $\pm$ 0.02 | 0.21 $\pm$ 0.01 | 0.01 $\pm$ 0.00 | 4.07 $\pm$ 0.18 | 3.03 $\pm$ 0.06 | 2.51 $\pm$ 0.20 |
| 15                                                                             | 4051                                | 1.15 $\pm$ 0.06 | 0.25 $\pm$ 0.00 | 0.01 $\pm$ 0.00 | 3.32 $\pm$ 0.14 | 2.20 $\pm$ 0.15 | 1.75 $\pm$ 0.25 |
| 16                                                                             | 5389                                | 0.93 $\pm$ 0.03 | 0.20 $\pm$ 0.00 | 0.01 $\pm$ 0.00 | 3.93 $\pm$ 0.07 | 2.83 $\pm$ 0.19 | 4.00 $\pm$ 0.07 |

Table S2. *Cont.*

| Sample                                                    | PRT 005<br>accession n° | Cotyledons  |             |             | Coats       |             |             |
|-----------------------------------------------------------|-------------------------|-------------|-------------|-------------|-------------|-------------|-------------|
|                                                           |                         | TPC_Cot     | TFC_Cot     | TPAC_Cot    | TPC_C       | TFC_C       | TPAC_C      |
| <b>Red varieties</b>                                      |                         |             |             |             |             |             |             |
| 17                                                        | 4120                    | 0.90 ± 0.03 | 0.18 ± 0.01 | 0.01 ± 0.00 | 3.47 ± 0.17 | 2.44 ± 0.25 | 1.96 ± 0.29 |
| 18                                                        | 5387                    | 1.12 ± 0.02 | 0.27 ± 0.01 | 0.01 ± 0.00 | 4.07 ± 0.19 | 2.37 ± 0.11 | 1.96 ± 0.35 |
| 19                                                        | 4070                    | 0.90 ± 0.00 | 0.21 ± 0.00 | 0.01 ± 0.00 | 3.56 ± 0.07 | 2.34 ± 0.12 | 1.84 ± 0.02 |
| 20                                                        | 5382                    | 0.86 ± 0.01 | 0.25 ± 0.00 | 0.01 ± 0.00 | 3.63 ± 0.10 | 2.49 ± 0.15 | 2.62 ± 0.31 |
| 21                                                        | 4149-R                  | 1.02 ± 0.07 | 0.22 ± 0.01 | 0.01 ± 0.00 | 4.13 ± 0.02 | 2.15 ± 0.16 | 3.50 ± 0.56 |
| <b>Light Brown variety</b>                                |                         |             |             |             |             |             |             |
| 22                                                        | 4081                    | 1.00 ± 0.01 | 0.22 ± 0.00 | 0.01 ± 0.00 | 3.14 ± 0.06 | 1.90 ± 0.10 | 1.98 ± 0.35 |
| <b>Brown varieties</b>                                    |                         |             |             |             |             |             |             |
| 23                                                        | 4182-B                  | 0.91 ± 0.02 | 0.16 ± 0.01 | 0.01 ± 0.00 | 4.57 ± 0.07 | 2.50 ± 0.08 | 3.71 ± 0.69 |
| 24                                                        | GC-34                   | 0.99 ± 0.02 | 0.19 ± 0.00 | 0.01 ± 0.00 | 3.60 ± 0.07 | 2.23 ± 0.23 | 1.86 ± 0.13 |
| 25                                                        | GC-35                   | 1.07 ± 0.03 | 0.25 ± 0.00 | 0.01 ± 0.00 | 3.73 ± 0.31 | 2.33 ± 0.05 | 3.05 ± 0.13 |
| 26                                                        | GC-17                   | 1.36 ± 0.06 | 0.29 ± 0.01 | 0.01 ± 0.00 | 4.61 ± 0.13 | 2.43 ± 0.23 | 2.29 ± 0.52 |
| <b>Brown background varieties with dark brown stripes</b> |                         |             |             |             |             |             |             |
| 27                                                        | 4194                    | 1.07 ± 0.02 | 0.29 ± 0.02 | 0.01 ± 0.00 | 3.72 ± 0.11 | 2.56 ± 0.18 | 3.23 ± 0.31 |
| 28                                                        | GC-40                   | 1.03 ± 0.04 | 0.20 ± 0.01 | 0.01 ± 0.00 | 3.00 ± 0.18 | 2.08 ± 0.14 | 1.83 ± 0.22 |
| 29                                                        | 5384                    | 0.98 ± 0.00 | 0.19 ± 0.01 | 0.01 ± 0.00 | 2.74 ± 0.10 | 1.59 ± 0.09 | 2.07 ± 0.37 |
| 30                                                        | 4085                    | 1.33 ± 0.03 | 0.25 ± 0.01 | 0.01 ± 0.00 | 4.02 ± 0.18 | 2.93 ± 0.12 | 3.69 ± 0.18 |
| 31                                                        | 4071                    | 0.90 ± 0.00 | 0.20 ± 0.00 | 0.01 ± 0.00 | 3.96 ± 0.33 | 2.57 ± 0.16 | 2.25 ± 0.16 |
| Average ± SD (n=31)                                       |                         | 0.99 ± 0.13 | 0.20 ± 0.04 | 0.01 ± 0.00 | 2.88 ± 1.49 | 1.83 ± 0.97 | 1.96 ± 1.23 |

**Table S3.** Contribution of the different parameters analyzed in the two first principal components

(\* loadings  $\geq |0.400|$ )

| Matrices                      | Parameters       | PC1    | PC2    |
|-------------------------------|------------------|--------|--------|
| Whole Flour<br>(WF)           | TPC              | 0.636* | 0.690* |
|                               | TFC              | 0.629* | 0.674* |
|                               | Two<br>step_TPAC | 0.622* | 0.641* |
|                               | ORAC             | 0.522* | 0.731* |
| Soaking Water<br>(SW)         | TPC              | 0.539* | 0.771* |
|                               | TFC              | 0.610* | 0.717* |
|                               | LogTPAC          | 0.724* | 0.562* |
| Soaked<br>Cotyledons<br>(Cot) | LogTPC           | 0.059  | 0.765* |
|                               | TFC              | 0.315  | 0.793* |
| Soaked Coats<br>(C)           | Two step_TPC     | 0.872* | 0.250  |
|                               | TFC              | 0.876* | 0.294  |
|                               | LogTPAC          | 0.724* | 0.562* |
| % Total variance (81.7)       |                  | 42.3   | 39.4   |

<sup>1</sup>. TPC, Total Phenolic Content; TFC, Total Flavonoid Content; TPAC, Total Proanthocyanidin Content;  
ORAC, Oxygen Radical Absorbance Capacity

6 **Table S4.** Average  $\pm$  standard deviation values of the parameters analyzed in the different fractions,  
 7 considering the clusters of common bean varieties defined by multivariate analysis. Different letters  
 8 indicate values significantly different between clusters (Scheffé's test,  $p < 0.05$ )

| Matrices                      | Parameters                     | Cluster 1                                                                                                                                                                                                                                  | Cluster 2                                                                                                                                                                                                                                              | Cluster 3                                                                                                                                                      |
|-------------------------------|--------------------------------|--------------------------------------------------------------------------------------------------------------------------------------------------------------------------------------------------------------------------------------------|--------------------------------------------------------------------------------------------------------------------------------------------------------------------------------------------------------------------------------------------------------|----------------------------------------------------------------------------------------------------------------------------------------------------------------|
| Whole Flour<br>(WF)           | TPC<br>(mg GAE/g DW)           | 2.21 $\pm$ 1.10 (a)                                                                                                                                                                                                                        | 5.10 $\pm$ 1.01 (b)                                                                                                                                                                                                                                    | 4.18 $\pm$ 0.88 (b)                                                                                                                                            |
|                               | TFC<br>(mg CE/g DW)            | 0.48 $\pm$ 0.41 (a)                                                                                                                                                                                                                        | 1.84 $\pm$ 0.55 (b)                                                                                                                                                                                                                                    | 1.57 $\pm$ 0.76 (b)                                                                                                                                            |
|                               | TPAC*<br>(mg CE/g DW)          | 0.10 $\pm$ 0.15 (a)                                                                                                                                                                                                                        | 0.65 $\pm$ 0.39 (b)                                                                                                                                                                                                                                    | 0.60 $\pm$ 0.27 (b)                                                                                                                                            |
|                               | ORAC<br>( $\mu$ mol TEAC/g DW) | 63.31 $\pm$ 35.71 (a)                                                                                                                                                                                                                      | 151.26 $\pm$ 33.54 (b)                                                                                                                                                                                                                                 | 112.92 $\pm$ 42.94 (b)                                                                                                                                         |
| Soaking Water<br>(SW)         | TPC<br>(mg GAE/g DW)           | 0.49 $\pm$ 0.48 (a)                                                                                                                                                                                                                        | 2.28 $\pm$ 0.66 (c)                                                                                                                                                                                                                                    | 1.50 $\pm$ 0.32 (b)                                                                                                                                            |
|                               | TFC<br>(mg CE/g FW)            | 0.25 $\pm$ 0.32 (a)                                                                                                                                                                                                                        | 1.40 $\pm$ 0.39 (b)                                                                                                                                                                                                                                    | 1.00 $\pm$ 0.30 (b)                                                                                                                                            |
|                               | TPAC*<br>(mg CE/g DW)          | 0.05 $\pm$ 0.03 (a)                                                                                                                                                                                                                        | 0.47 $\pm$ 0.28 (b)                                                                                                                                                                                                                                    | 0.44 $\pm$ 0.36 (b)                                                                                                                                            |
| Soaked<br>Cotyledons<br>(Cot) | TPC*<br>(mg GAE/g DW)          | 0.92 $\pm$ 0.10 (a)                                                                                                                                                                                                                        | 1.04 $\pm$ 0.11 (b)                                                                                                                                                                                                                                    | 0.89 $\pm$ 0.03 (a)                                                                                                                                            |
|                               | TFC<br>(mg CE/g DW)            | 0.17 $\pm$ 0.03 (a)                                                                                                                                                                                                                        | 0.22 $\pm$ 0.04 (b)                                                                                                                                                                                                                                    | 0.20 $\pm$ 0.03 (ab)                                                                                                                                           |
| Soaked Coats<br>(C)           | TPC*<br>(mg GAE/g DW)          | 0.80 $\pm$ 1.05 (a)                                                                                                                                                                                                                        | 3.58 $\pm$ 0.41 (b)                                                                                                                                                                                                                                    | 3.90 $\pm$ 0.42 (b)                                                                                                                                            |
|                               | TFC*<br>(mg CE/g DW)           | 0.52 $\pm$ 0.74 (a)                                                                                                                                                                                                                        | 2.27 $\pm$ 0.31 (b)                                                                                                                                                                                                                                    | 2.53 $\pm$ 0.18 (b)                                                                                                                                            |
|                               | TPAC<br>(mg CE/g DW)           | 0.39 $\pm$ 0.54 (a)                                                                                                                                                                                                                        | 2.45 $\pm$ 0.68 (b)                                                                                                                                                                                                                                    | 3.15 $\pm$ 0.84 (b)                                                                                                                                            |
| Color                         |                                | <ul style="list-style-type: none"> <li>• White (n=5)</li> <li>• White background with brown speckles and brown marginal pattern (n=1)</li> <li>• Yellow (n=1)</li> <li>• White and brown background (n=1)</li> <li>• Pink (n=1)</li> </ul> | <ul style="list-style-type: none"> <li>• Pink (n=1)</li> <li>• Pink background with purple stripes (n=2)</li> <li>• Red (n=2)</li> <li>• Light brown (n=1)</li> <li>• Brown (n=3)</li> <li>• Brown background with dark brown stripes (n=5)</li> </ul> | <ul style="list-style-type: none"> <li>• Pink (n=1)</li> <li>• Pink background with brown stripes (n=1)</li> <li>• Red (n=2)</li> <li>• Brown (n=1)</li> </ul> |

9 TPC, Total Phenolic Content; TFC, Total Flavonoid Content; TPAC, Total Proanthocyanidin Content;  
 10 ORAC, Oxygen Radical Absorbance Capacity; \*Differences established based on the results obtained for  
 11 the transformed variables (Two-step TPAC\_WF, LogTPC\_Cot, Two-step TPC\_C, Two-step TFC\_C,  
 12 LogTPAC\_SW)

13

14

15

**Table S5.** Discriminant analysis to evaluate the clustering solution

| Sample | PRT 005<br>accession n <sup>o</sup> | Probability Cluster 1 | Probability Cluster 2 | Probability Cluster 3 |
|--------|-------------------------------------|-----------------------|-----------------------|-----------------------|
| 1      | 4144                                | <b>0.99969</b>        | 0.00030               | 0.00000               |
| 2      | 5383                                | <b>0.99983</b>        | 0.00017               | 0.00000               |
| 3      | 4088                                | <b>0.99967</b>        | 0.00032               | 0.00000               |
| 4      | 1979                                | <b>0.9999</b>         | 0.00010               | 0.00000               |
| 5      | 5249                                | <b>0.99995</b>        | 0.00005               | 0.00000               |
| 6      | 5388                                | <b>0.93889</b>        | 0.06106               | 0.00005               |
| 7      | 4185                                | <b>0.82926</b>        | 0.16890               | 0.00184               |
| 8      | 4189                                | <b>0.92679</b>        | 0.07316               | 0.00005               |
| 9      | 4110                                | 0.00000               | 0.04910               | <b>0.95090</b>        |
| 10     | 4179                                | <b>0.94335</b>        | 0.05665               | 0.00000               |
| 11     | 4182-P                              | 0.04226               | <b>0.9088</b>         | 0.04894               |
| 12*    | 4119                                | -                     | -                     | -                     |
| 13     | 4097                                | 0.00164               | <b>0.95521</b>        | 0.04315               |
| 14*    | 4038                                | -                     | -                     | -                     |
| 15     | 4051                                | 0.00250               | <b>0.9975</b>         | 0.00001               |
| 16     | 5389                                | 0.00000               | 0.00391               | <b>0.99609</b>        |
| 17     | 4120                                | 0.01265               | 0.4774                | <b>0.50995</b>        |
| 18     | 5387                                | 0.00010               | <b>0.99947</b>        | 0.00043               |
| 19     | 4070                                | 0.01355               | <b>0.89223</b>        | 0.09422               |
| 20     | 5382                                | 0.00031               | 0.5045                | <b>0.49519</b>        |
| 21     | 4149-R                              | 0.00023               | <b>0.81993</b>        | 0.17984               |
| 22     | 4081                                | 0.00801               | <b>0.99185</b>        | 0.00014               |
| 23     | 4182-B                              | 0.00000               | 0.00017               | <b>0.99983</b>        |
| 24     | GC-34                               | 0.01436               | <b>0.9714</b>         | 0.01424               |
| 25     | GC-35                               | 0.00138               | <b>0.99718</b>        | 0.00144               |
| 26*    | GC-17                               | -                     | -                     | -                     |
| 27     | 4194                                | 0.00001               | <b>0.99898</b>        | 0.00101               |
| 28     | GC-40                               | 0.03397               | <b>0.96572</b>        | 0.0003                |
| 29     | 5384                                | 0.22949               | <b>0.7686</b>         | 0.00191               |
| 30     | 4085-P                              | 0.00000               | <b>0.99668</b>        | 0.00332               |
| 31     | 4071                                | 0.00000               | <b>0.73148</b>        | 0.26852               |

16 \*Excluded samples from multivariate analysis (values of TPC\_C, TFC\_C and TPAC\_WF were out of  
17 ranking in the two-step transformed variables)

18

19

Table S6. Molecular structure of the compounds identified

| Family                | Molecular structure                                                                 | Substituent groups                                                                                                                            | Compound                                                                                                                                                                 |
|-----------------------|-------------------------------------------------------------------------------------|-----------------------------------------------------------------------------------------------------------------------------------------------|--------------------------------------------------------------------------------------------------------------------------------------------------------------------------|
| Hydroxybenzoic acids  | 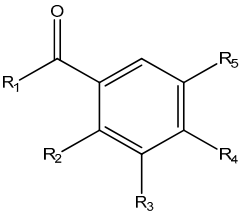   | R <sub>1</sub> -OH; R <sub>2</sub> -H; R <sub>3</sub> -OH; R <sub>4</sub> -OH; R <sub>5</sub> -H                                              | Protocatechuic acid                                                                                                                                                      |
|                       |                                                                                     | R <sub>1</sub> -OH; R <sub>2</sub> -H; R <sub>3</sub> -OH; R <sub>4</sub> -OC <sub>6</sub> H <sub>12</sub> O <sub>6</sub> ; R <sub>5</sub> -H | Protocatechuic acid-4- <i>O</i> -glucoside                                                                                                                               |
|                       |                                                                                     | R <sub>1</sub> -OH; R <sub>2</sub> -H; R <sub>3</sub> -H; R <sub>4</sub> -OH; R <sub>5</sub> -H                                               | <i>p</i> -hydroxybenzoic acid                                                                                                                                            |
|                       |                                                                                     | R <sub>1</sub> -OH; R <sub>2</sub> -H; R <sub>3</sub> -H; R <sub>4</sub> -OC <sub>6</sub> H <sub>12</sub> O <sub>6</sub> ; R <sub>5</sub> -H  | <i>p</i> -hydroxybenzoic acid-4- <i>O</i> -glucoside                                                                                                                     |
|                       |                                                                                     | R <sub>1</sub> -OH; R <sub>2</sub> -H; R <sub>3</sub> -H; R <sub>4</sub> -OH; R <sub>5</sub> -OCH <sub>3</sub>                                | Vanillic acid                                                                                                                                                            |
|                       |                                                                                     | R <sub>1</sub> -OH; R <sub>2</sub> -H; R <sub>3</sub> -H; R <sub>4</sub> -OH; R <sub>5</sub> -OH                                              | Gentisic acid                                                                                                                                                            |
| Hydroxycinnamic acids |    | R <sub>1</sub> -OCH <sub>3</sub> ; R <sub>2</sub> -H; R <sub>3</sub> -OH                                                                      | Ferulic acid                                                                                                                                                             |
|                       |                                                                                     | R <sub>1</sub> -H; R <sub>2</sub> -H; R <sub>3</sub> -OH                                                                                      | <i>p</i> -Coumaric acid                                                                                                                                                  |
|                       |                                                                                     | R <sub>1</sub> -OCH <sub>3</sub> ; R <sub>2</sub> -OCH <sub>3</sub> ; R <sub>3</sub> -OH                                                      | Sinapic acid                                                                                                                                                             |
|                       |                                                                                     | R <sub>1</sub> -OCH <sub>3</sub> ; R <sub>2</sub> -H; R <sub>3</sub> -C <sub>6</sub> H <sub>10</sub> O <sub>8</sub>                           | trans-Feruloyl aldaric acid isomers                                                                                                                                      |
|                       |                                                                                     | R <sub>1</sub> -H; R <sub>2</sub> -H; R <sub>3</sub> -C <sub>6</sub> H <sub>10</sub> O <sub>8</sub>                                           | trans- <i>p</i> -coumaroyl aldaric acid isomers                                                                                                                          |
|                       |                                                                                     | R <sub>1</sub> -OCH <sub>3</sub> ; R <sub>2</sub> -OCH <sub>3</sub> ; R <sub>3</sub> -C <sub>6</sub> H <sub>10</sub> O <sub>8</sub>           | Sinapoyl aldaric acid isomers                                                                                                                                            |
| Flavan-3-ol           |   | R <sub>1</sub> -OH; R <sub>2</sub> -H; R <sub>3</sub> -OH                                                                                     | (+)-Catechin/ (-)-Epicatechin                                                                                                                                            |
|                       |                                                                                     | R <sub>1</sub> -OH; R <sub>2</sub> -H; R <sub>3</sub> -OC <sub>6</sub> H <sub>12</sub> O <sub>6</sub>                                         | (+)-Catechin-3'- <i>O</i> -glucoside                                                                                                                                     |
|                       |                                                                                     | R <sub>1</sub> -OC <sub>6</sub> H <sub>12</sub> O <sub>6</sub> ; R <sub>2</sub> -H; R <sub>3</sub> -OH                                        | (+)-Catechin-7- <i>O</i> -glucoside                                                                                                                                      |
|                       |                                                                                     | R <sub>1</sub> -OH; R <sub>2</sub> -C <sub>15</sub> H <sub>14</sub> O <sub>6</sub> ; R <sub>3</sub> -OH                                       | Procyanidin B1, B2, B3, B4, B5                                                                                                                                           |
|                       |                                                                                     | R <sub>1</sub> -OH; R <sub>2</sub> -C <sub>30</sub> H <sub>26</sub> O <sub>12</sub> ; R <sub>3</sub> -OH                                      | Procyanidin C1, C2                                                                                                                                                       |
| Flavanone             |  | R <sub>1</sub> -OH; R <sub>2</sub> -OH; R <sub>3</sub> -OH; R <sub>4</sub> -OH                                                                | Eriodictyol<br>(-R groups, could be substituted by -OC <sub>6</sub> H <sub>12</sub> O <sub>6</sub> giving rise to 4 different eriodictyol- <i>O</i> -hexoside compounds) |
|                       |                                                                                     | R <sub>1</sub> -OH; R <sub>2</sub> -OH; R <sub>3</sub> -H; R <sub>4</sub> -OH                                                                 | Naringenin                                                                                                                                                               |
|                       |                                                                                     | R <sub>1</sub> -OC <sub>6</sub> H <sub>12</sub> O <sub>6</sub> ; R <sub>2</sub> -OH; R <sub>3</sub> -H; R <sub>4</sub> -OH                    | Naringenin-7- <i>O</i> -glucoside                                                                                                                                        |

20

21

22

23



24

Table S3. Cont.

25

| Family     | Molecular structure | Substituent groups                                                                             | Compound                                              |
|------------|---------------------|------------------------------------------------------------------------------------------------|-------------------------------------------------------|
| Flavonols  |                     | $R_1\text{-OH}; R_2\text{-OH}; R_3\text{-H}$                                                   | Kaempferol                                            |
|            |                     | $R_1\text{-OH}; R_2\text{-OC}_{11}\text{H}_{20}\text{O}_{10}; R_3\text{-H}$                    | Kaempferol-3- <i>O</i> -xylosyl-glucoside             |
|            |                     | $R_1\text{-OH}; R_2\text{-OC}_6\text{H}_{12}\text{O}_6; R_3\text{-H}$                          | Kaempferol-3- <i>O</i> -glucoside                     |
|            |                     | $R_1\text{-OH}; R_2\text{-OC}_8\text{H}_{14}\text{O}_7; R_3\text{-H}$                          | Kaempferol-3- <i>O</i> -acetyl-glucoside              |
|            |                     | $R_1\text{-OH}; R_2\text{-OH}; R_3\text{-OH}$                                                  | Quercetin                                             |
|            |                     | $R_1\text{-OH}; R_2\text{-OC}_6\text{H}_{12}\text{O}_6; R_3\text{-OH}$                         | Quercetin-3- <i>O</i> -glucoside                      |
|            |                     | $R_1\text{-OH}; R_2\text{-OC}_8\text{H}_{14}\text{O}_7; R_3\text{-OH}$                         | Quercetin-3-(6- <i>O</i> -acetyl- $\beta$ -glucoside) |
|            |                     | $R_1\text{-OC}_6\text{H}_{12}\text{O}_6; R_2\text{-H}; R_3\text{-OC}_6\text{H}_{12}\text{O}_6$ | Luteolin-3',7-di- <i>O</i> -glucoside                 |
| Isoflavone |                     | $R_1\text{-H}$                                                                                 | Daidzein                                              |
|            |                     | $R_1\text{-OH}$                                                                                | Genistein                                             |

26

27
